# Supplementary material for: VPA improves ferroptosis in tubular epithelial cells after cisplatin-induced acute kidney injury
Source: PubMed Central journal article supplement (PMC10155836; doi:10.3389/fphar.2023.1147772), 2023-04-19
Supplement: DataSheet2.pdf [file DataSheet2.pdf]

**Supplementary Table 1. Reagents used in this study.**

| <b>Reagents</b>                         | <b>Supplier</b>                                   | <b>Catalog number</b> |
|-----------------------------------------|---------------------------------------------------|-----------------------|
| cis-Diammineplatinum dichloride         | Aladdin, China                                    | D109812               |
| Valproic acid                           | MedChemExpress, USA                               | HY-10585A             |
| Ferrostain-1                            | MedChemExpress, USA                               | HY-100579             |
| Puromycin dihydrochloride hydrate       | Beijing solarbio science and technology, China    | PB230                 |
| Blood urea nitrogen assay kit           | Nanjing Jiancheng Bioengineering Institute, China | C013-2-1              |
| Creatinine assay kit                    | Nanjing Jiancheng Bioengineering Institute, China | C011-2-1              |
| Hematoxylin and eosin staining kit      | Servicebio, Wuhan, China                          | GP1032                |
| Mouse HDAC1 Elisa kit                   | Sino Best Biological Technology Shanghai, China   | YX-E10432             |
| Mouse HDAC2 Elisa kit                   | Sino Best Biological Technology Shanghai, China   | YX-E10441             |
| Reduced glutathione (GSH) assay kit     | Nanjing Jiancheng Bioengineering Institute, China | A006-2-1              |
| Malondialdehyde (MDA) assay kit         | Nanjing Jiancheng Bioengineering Institute, China | A003-1-2              |
| Cell malondialdehyde (MDA) assay kit    | Nanjing Jiancheng Bioengineering Institute, China | A003-4-1              |
| Reactive oxygen species (ROS) assay kit | Beyotime biotechnology, China                     | S0033M                |
| One step TUNEL apoptosis assay kit      | Beyotime biotechnology, China                     | C1088                 |
| Propidium iodide (PI)                   | Beijing solarbio science and technology, China    | CA1630                |

**Supplementary Table 2. Antibodies used in this study.**

| <b>Antibodies</b>       | <b>Dilution and supplier</b>             | <b>Catalog number</b> | <b>Application</b> |
|-------------------------|------------------------------------------|-----------------------|--------------------|
| HDAC1                   | 1:1000/1:200, Proteintech, Wuhan, China  | 66085-1-Ig            | WB/IHC             |
| HDAC2                   | 1:1000/1:200, Abcam, UK                  | ab32117               | WB/IHC             |
| ACSL4                   | 1:1000/1:200, Abcam, UK                  | ab155282              | WB/IHC             |
| GPX4                    | 1:1000/1:200, Abcam, UK                  | ab125066              | WB/IF              |
| Histone H3 (acetyl K27) | 1:1000, Abcam, UK                        | ab4729                | WB                 |
| GAPDH                   | 1:5000, Proteintech, Wuhan, China        | 60004-1-Ig            | WB                 |
| Goat anti-Rabbit IgG    | 1:5000/1:200, Beijing TDY Biotech, China | S004F                 | WB/IHC             |
| Goat anti-Mouse IgG     | 1:5000/1:200, Beijing TDY Biotech, China | S001F                 | WB/IHC             |

**Supplementary Table 3. Sequences of the three small interfering RNA targeting human *GPX4* mRNA.**

| <b>Species</b> | <b>Gene</b>                   | <b>Sequence (5'-3')</b>            |
|----------------|-------------------------------|------------------------------------|
| Human          | <i>GPX4</i><br>SiRNA-homo-273 | sense 5'-GACCGAAGUAAACUACACUTT     |
|                |                               | antisense 5'-AGUGUAGUUUACUUCGGUCTT |
|                | <i>GPX4</i><br>SiRNA-homo-380 | sense 5'-GGAGUACGAAGAGAUCAATT      |
|                |                               | antisense 5'-UUGAUCUCUUCGUUACUCCTT |
|                | <i>GPX4</i><br>SiRNA-homo-479 | sense 5'-GGAAGUGGAUGAAGAUCCATT     |
|                |                               | antisense 5'-UGGAUCUUCAUCCACUUCCTT |

**Supplementary Table 4. Primers for Real-time PCR**

| <b>Species</b> | <b>Gene</b>  | <b>Sequence (5'-3')</b>             |
|----------------|--------------|-------------------------------------|
| Mouse          | Gapdh        | sense 5'-TGACCTCAACTACATGGTCTACA-3' |
|                |              | antisense 5'-CTTCCCATTCTCGGCCTTG-3' |
|                | <i>Kim-1</i> | sense 5'-ACATATCGTGGAATCACAACGAC    |
|                |              | antisense 5'-ACTGCTCTTCTGATAGGTGACA |
|                | <i>Ngal</i>  | sense 5'-GCCCAGGACTCAACTCAGAA       |
|                |              | antisense 5'-GACCAGGATGGAGGTGACAT   |
